# Supplementary material for: Development and validation of the Exteroceptive Body Awareness (EBA-q) questionnaire
Source: PeerJ journal article supplement (doi:10.7717/peerj.15382), 2023-08-24
Supplement: Categorical_data_conversion_EBA.docx [file Categorical_data_conversion_EBA.docx]

The only categorical data is related to sex: 1= male; 0= female.

All other data are scale data, Likert scale values are reported in the manuscript text.
