# Supplementary material for: Development and validation of the Exteroceptive Body Awareness (EBA-q) questionnaire
Source: PubMed Central journal article supplement — PeerJ. 2023 Aug 24;11:e15382. doi: 10.7717/peerj.15382 (PMC10460568; doi:10.7717/peerj.15382), 2023-08-24
Supplement: peerj-11-15382-s001.pdf [file peerj-11-15382-s001.pdf]

## **Supplementary Material for Development and validation of the Exteroceptive Body Awareness (EBA) questionnaire.**

### **Original instructions presented to participants in Italian:**

*Rispondi alle seguenti domande su te stesso/a, selezionando l'opzione che indica quanto ogni affermazione è caratteristica di te, usando una scala a 5 punti (da "estremamente non caratteristica" a "estremamente caratteristica").*

Le etichette per i 5 punti sono:

- 1 = Estremamente non caratteristica
- 2 = Non caratteristica
- 3 = Neutrale
- 4 = Caratteristica
- 5 = Estremamente caratteristica

### **Original items presented to participants in Italian:**

1. Capisco subito se riuscirò a raggiungere un oggetto su uno scaffale alto, senza usare rialzi.
2. Spesso mi capita di provare a prendere oggetti da uno scaffale alto, senza raggiungerlo. (RC)
3. Capisco subito se riuscirò a passare sotto un soffitto basso, senza abbassarmi.
4. Mi capita spesso di sbattere la testa perché ho sottostimato la mia altezza. (RC)
5. Mi accorgo subito quando il mio peso cambia, anche se di poco.
6. Capisco subito se un indumento mi entrerà, anche prima di provarlo.
7. Mi rendo subito conto se e di quanto devo ruotare il mio corpo per attraversare un passaggio.
8. Quando vedo un posto a sedere, capisco subito se è troppo stretto per me.
9. Capisco subito se una cintura mi calzerà oppure se vanno aggiunti ulteriori for perché è troppo piccola o troppo grande.
10. Capisco subito se un paio di scarpe mi calzerà, anche prima di averlo provato.
11. Penso di avere una buona consapevolezza del mio corpo nello spazio.
12. Capisco subito se riuscirò a salire su un mezzo pubblico quando è molto pieno.
13. Riesco a capire subito se una coperta è lunga abbastanza per coprimi per intero.
14. Mentre cammino, sbatto spesso contro altre persone, perché non mi rendo conto di quanto spazio occupa il mio corpo. (RC)

15. Sbatto spesso contro mobili, oggetti, e porte, anche in ambienti familiari, perché non mi rendo conto di quanto spazio occupa il mio corpo. (RC)
16. Quando prendo un po' di sole, faccio molto caso al cambiamento di colore della mia pelle, anche se piccolo.
17. A volte mi capita che altre persone mi facciano notare il cambiamento di colore della mia pelle (ad es. arrossamento, abbronzatura), quando io non me ne sono accorto/a. (RC)
18. Mi accorgo subito se compare qualche macchia sulla mia pelle.
19. Mi accorgo se le dimensioni dei miei nei cambiano, anche se di poco.
20. Uso spesso lo specchio per rendermi conto di come cambia il mio corpo.
21. Ogni tanto mi capita di non riconoscermi quando mi vedo in una foto o un video (RC)
22. Quando qualcuno mi tocca, capisco con precisione in che punto sono stato/a toccato.
23. Mi accorgo immediatamente se un piccolo insetto si posa sulla mia pelle.
24. A volte mi capita che altre persone mi facciano notare che ho un insetto appoggiato sulla pelle, quando io non me ne sono accorta/o. (RC)
25. A volte mi capita di non accorgermi di avere dei residui di cibo sul viso (RC)
26. Mi accorgo subito quando comincio a sudare, anche se poco.
27. Quando finisco in una pozzanghera, mi accorgo subito se il mio piede si è bagnato.
28. Faccio molto caso alla sensazione prodotta dal tessuto dei vestiti sulla mia pelle.
29. Mi capita di cercare accessori, per poi accorgermi di averli già addosso e.g. occhiali, orologi, bracciali (RC)
30. Mi accorgo subito quando comincio ad avere un brutto odore corporeo.
31. Mi accorgo subito quando comincio ad avere un alito cattivo.
32. Mi capita di non accorgermi subito quando i miei piedi cominciano ad avere un cattivo odore. (RC)
33. Quando sento un brutto odore, mi accorgo subito se proviene dal mio corpo.
